# Supplementary material
Source: publisher figshare collection journal article supplement (https://tandf.figshare.com/ndownloader/files/32836521)

## SUPPLEMENTAL DATA

### Appendix I.

Alarm sequences given by six groups of titi monkeys in response to experimental presentations of predator models. One line represents one sequence (up to 50 first calls), with each A representing an A-call, each B, a B-call, each O, an ‘other’ call (either another call type, or an undetermined call type), and blanks, sequences of less than 50 calls.



## Appendix II.

Value of the variance explained for each computed random forest (N=1,197), sorted by increasing values.

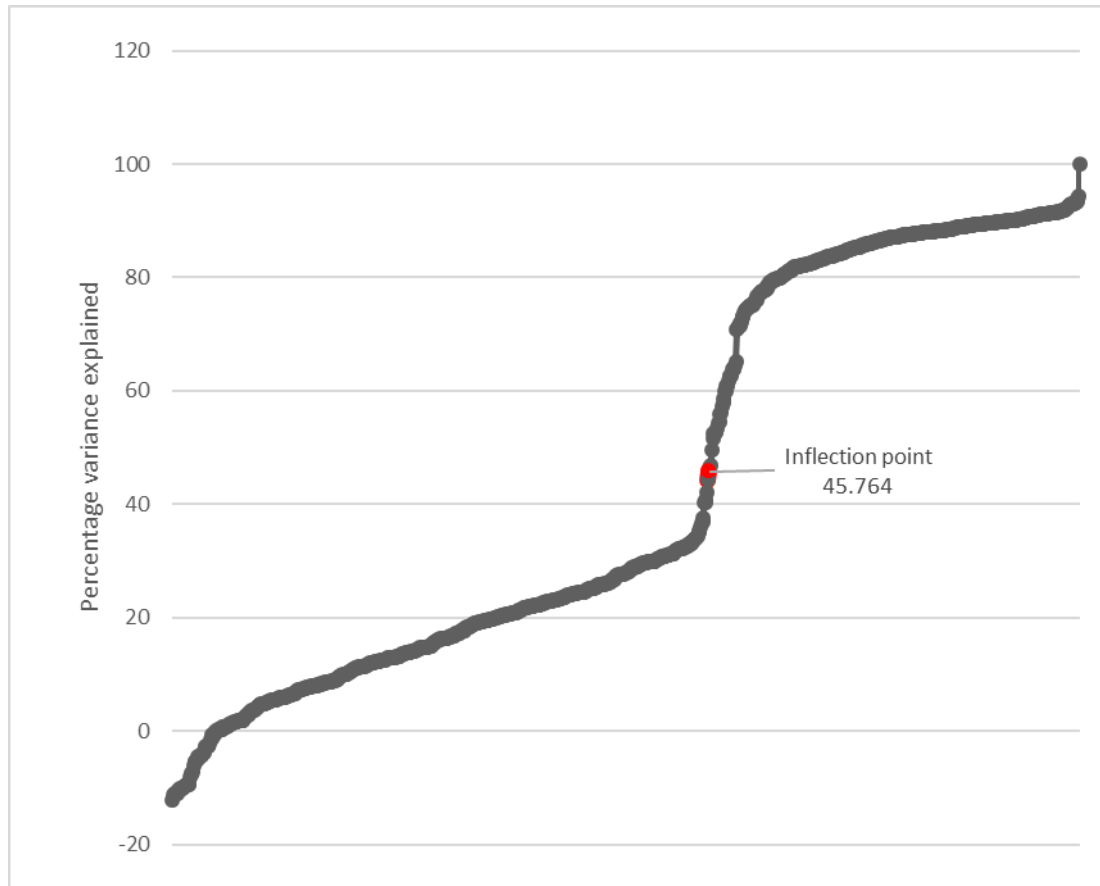

# Appendix III.

|                                 |                                    | LENGTH OF THE SEQUENCE |     |     |     |     |     |     |     |     |     |     |     |     |     |     |     |     |     |     |     |     |     |     |     |     |
|---------------------------------|------------------------------------|------------------------|-----|-----|-----|-----|-----|-----|-----|-----|-----|-----|-----|-----|-----|-----|-----|-----|-----|-----|-----|-----|-----|-----|-----|-----|
|                                 |                                    | 1                      | 2   | 3   | 4   | 5   | 6   | 7   | 8   | 9   | 10  | 11  | 12  | 13  | 14  | 15  | 16  | 17  | 18  | 19  | 20  | 21  | 22  | 23  | 24  | 25  |
| S<br>C<br>I<br>R<br>T<br>E<br>M | Last call                          | *                      | *** | **  | *** | **  | **  | *   | *   | *   | *   | *** | -   | *   | *   | -   | -   | *   | **  | **  | -   | *   | -   | -   | -   | -   |
|                                 | Proportion of A-calls              | *                      | *** | *** | *** | *** | *** | *** | *** | *** | *** | *** | *** | *** | *** | *** | *** | *** | *** | *** | *** | *** | *** | *** | *** | *** |
|                                 | Proportion of B-calls              | *                      | *** | **  | *** | *** | *** | *** | *** | *** | *** | *** | *** | *** | *** | *** | *** | *** | *** | *** | *** | *** | *** | *** | *** | *** |
|                                 | Transition probability from A to A | x                      | *** | *** | *** | *** | *** | *** | *** | *** | *** | *** | *** | -   | -   | -   | -   | -   | *** | *** | *** | *** | *** | *** | *** | *** |
|                                 | Transition probability from B to B | x                      | *   | **  | **  | *** | *** | *** | *** | *** | *** | *** | *** | *** | *** | *** | *** | *** | *** | *** | *** | *** | *** | *** | *** | *** |
|                                 | Proportion of 2-gramss AA          | x                      | *** | *** | *** | *** | *** | *** | *** | *** | *** | *** | *** | -   | -   | -   | -   | -   | *** | *** | *** | *** | *** | *** | *** | *** |
|                                 | Proportion of 2-grams BB           | x                      | *   | **  | **  | *** | *** | *** | *** | *** | *** | *** | *** | *** | *** | *** | *** | *** | *** | *** | *** | *** | *** | *** | *** | *** |
|                                 | Proportion of 3-grams AAA          | x                      | x   | **  | *** | *** | **  | **  | *** | *** | *** | *** | **  | **  | **  | *** | **  | **  | **  | *   | *** | **  | **  | **  | **  | **  |
|                                 | Proportion of 3-grams BAB          | x                      | x   | -   | -   | -   | -   | -   | *   | **  | -   | -   | -   | -   | -   | -   | -   | -   | -   | -   | -   | -   | -   | -   | -   | -   |
|                                 | Proportion of 3-grams BBA          | x                      | x   | -   | -   | -   | -   | -   | **  | *   | -   | -   | -   | -   | -   | -   | -   | -   | -   | -   | -   | -   | -   | -   | -   | -   |
|                                 | Proportion of 3-grams BBB          | x                      | x   | *   | **  | **  | *** | *** | *** | *** | *** | *** | *** | *** | *** | *** | *** | *** | *** | *** | *** | *** | *** | *** | *** | *** |

|                                 |                                    | LENGTH OF THE SEQUENCE |     |     |     |     |     |     |     |     |     |     |     |     |     |     |     |     |     |     |     |     |     |     |     |     |
|---------------------------------|------------------------------------|------------------------|-----|-----|-----|-----|-----|-----|-----|-----|-----|-----|-----|-----|-----|-----|-----|-----|-----|-----|-----|-----|-----|-----|-----|-----|
|                                 |                                    | 26                     | 27  | 28  | 29  | 30  | 31  | 32  | 33  | 34  | 35  | 36  | 37  | 38  | 39  | 40  | 41  | 42  | 43  | 44  | 45  | 46  | 47  | 48  | 49  | 50  |
| S<br>C<br>I<br>R<br>T<br>E<br>M | Last call                          | -                      | *   | *   | -   | -   | -   | *   | -   | *   | *   | *   | -   | -   | -   | -   | *   | -   | -   | -   | *   | -   | -   | *   | -   | *   |
|                                 | Proportion of A-calls              | ***                    | *** | *** | *** | *** | *** | *** | *** | *** | *** | *** | *** | *** | *** | *** | *** | *** | **  | **  | **  | **  | **  | **  | **  | **  |
|                                 | Proportion of B-calls              | ***                    | *** | *** | *** | *** | *** | *** | *** | *** | *** | *** | *** | *** | *** | *** | *** | *** | *** | *** | *** | *** | *** | *** | *** | **  |
|                                 | Transition probability from A to A | ***                    | *** | *** | *** | *** | **  | **  | **  | **  | **  | **  | **  | **  | **  | **  | **  | -   | -   | **  | **  | -   | -   | -   | **  | **  |
|                                 | Transition probability from B to B | ***                    | *** | *** | *** | *** | *** | *** | *** | *** | *** | *** | *** | *** | *** | *** | *** | *** | *** | *** | *** | *** | *** | *** | *** | *** |
|                                 | Proportion of 2-gramss AA          | ***                    | *** | *** | *** | *** | **  | **  | **  | **  | **  | **  | **  | **  | **  | **  | -   | -   | -   | -   | -   | -   | **  | **  | **  | **  |
|                                 | Proportion of 2-grams BB           | ***                    | *** | *** | *** | *** | *** | *** | *** | *** | *** | *** | *** | *** | *** | *** | *** | *** | *** | *** | *** | *** | *** | *** | *** | *** |
|                                 | Proportion of 3-grams AAA          | **                     | **  | -   | **  | -   | **  | **  | **  | **  | **  | **  | **  | **  | **  | **  | **  | **  | **  | **  | **  | **  | **  | **  | **  | **  |
| M                               | Proportion of 3-grams BAB          | -                      | -   | -   | -   | -   | -   | -   | -   | -   | -   | -   | -   | -   | -   | -   | -   | -   | -   | -   | -   | -   | -   | -   | -   |     |
|                                 | Proportion of 3-grams BBA          | -                      | -   | -   | -   | -   | -   | -   | -   | -   | -   | -   | -   | -   | -   | -   | -   | -   | -   | -   | -   | -   | -   | -   | -   |     |
|                                 | Proportion of 3-grams BBB          | ***                    | *** | *** | *** | *** | *** | *** | *** | *** | *** | *** | *** | *** | *** | *** | *** | *** | *** | *** | *** | *** | *** | *** | *** | *** |

#### Appendix IV.

Summary of the random forest's analysis. Random forests were retained in the analysis if their variance explained was greater than the threshold (see Appendix II).

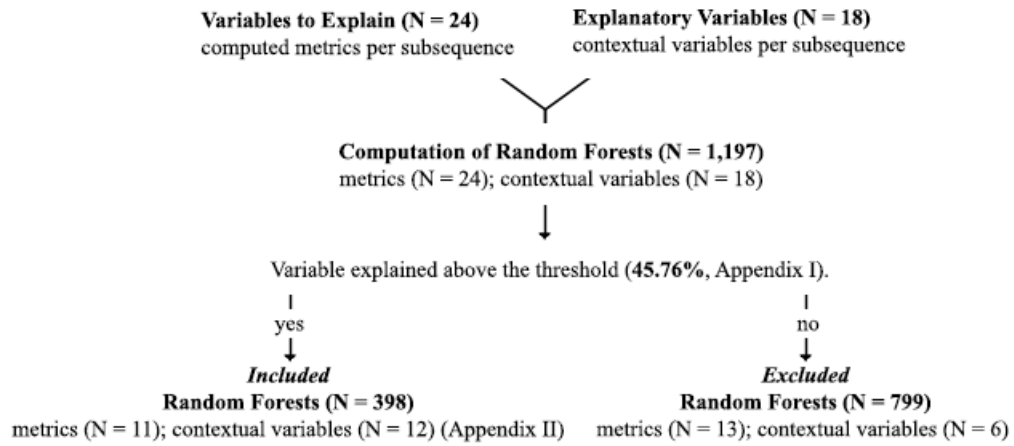

Supplement: Supplementary file 1 [file 32836521]
